# Supplementary material
Source: PubMed Central journal article supplement (PMC4970759)

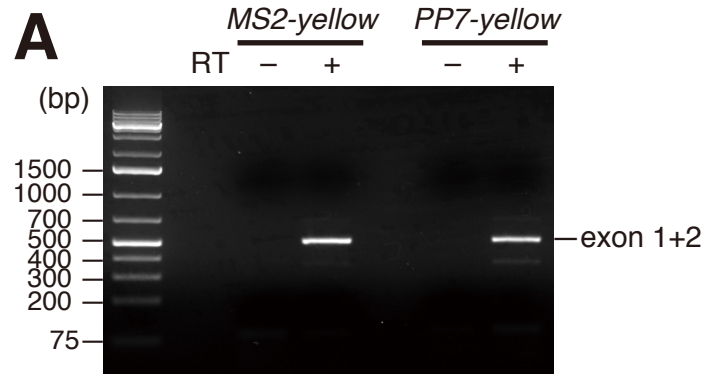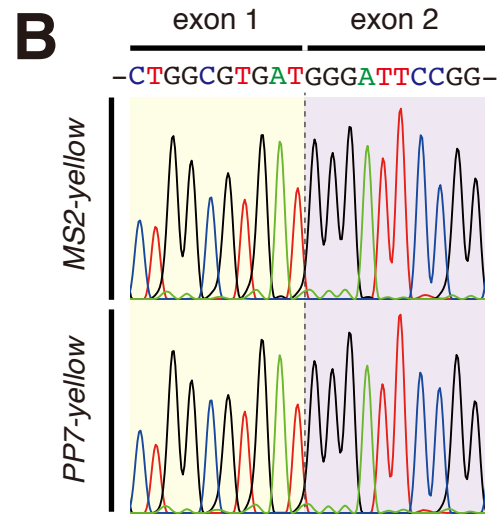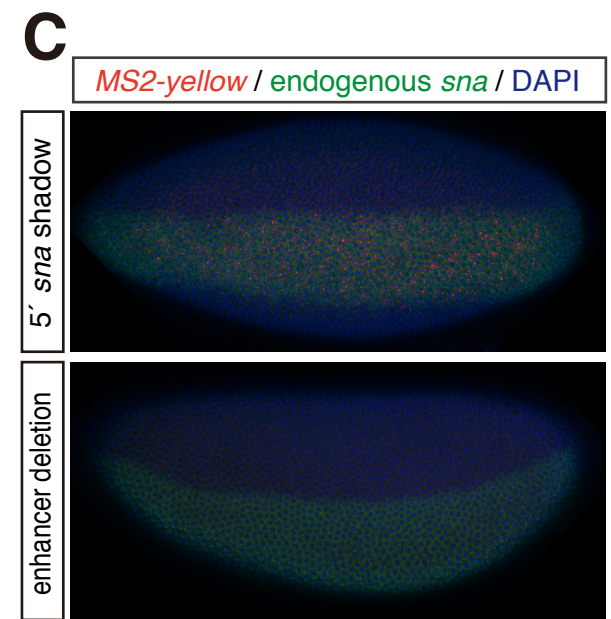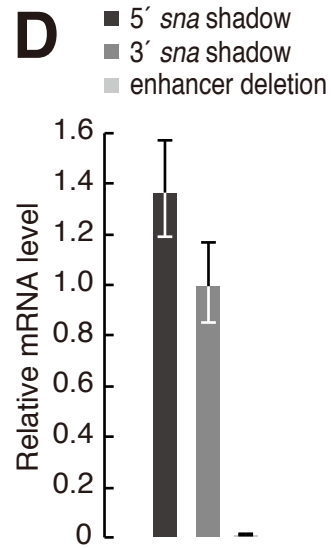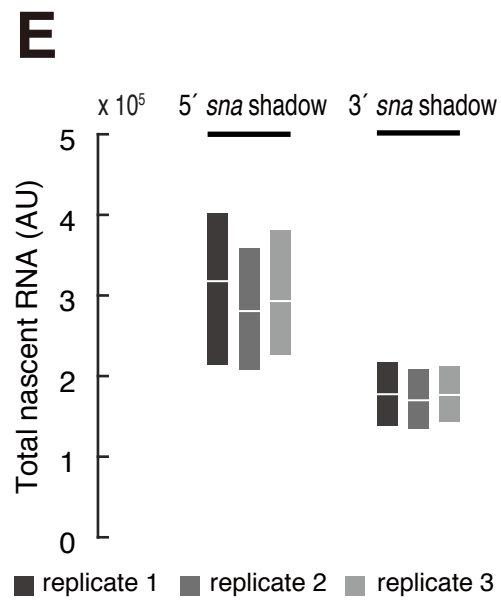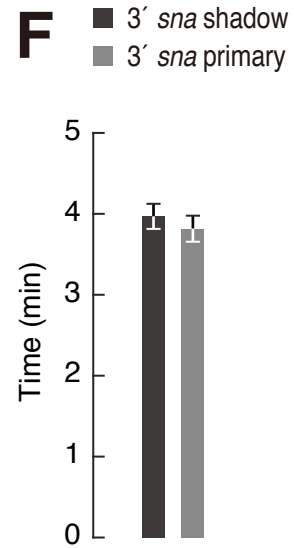

Supplement: NIHMS795316-supplement-1.pdf [file NIHMS795316-supplement-1.pdf]

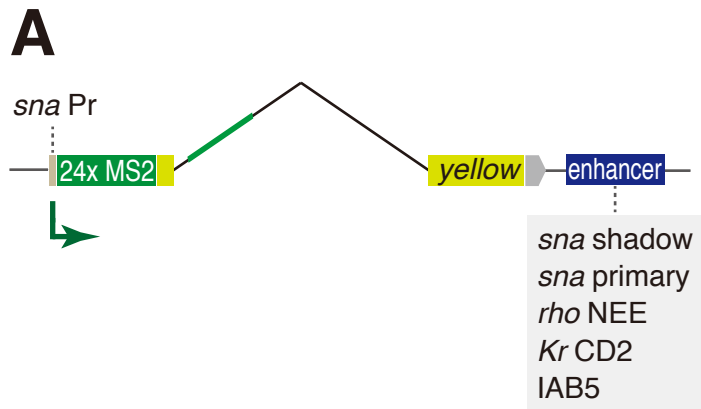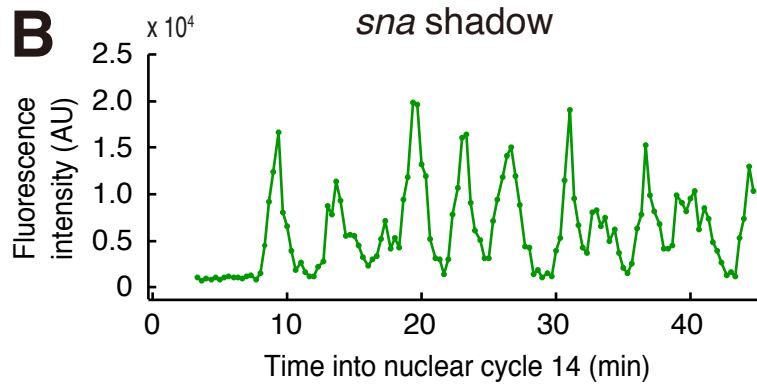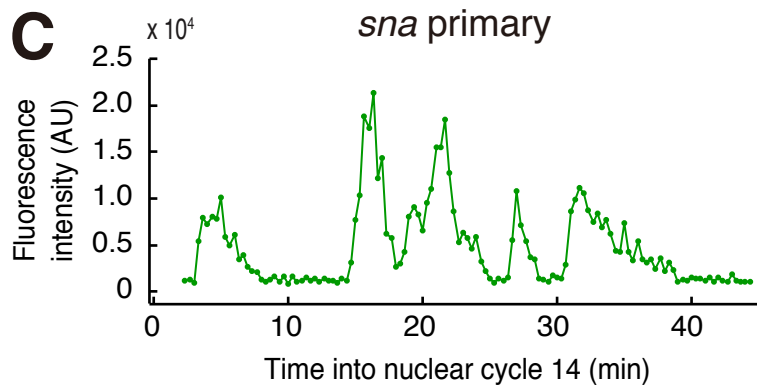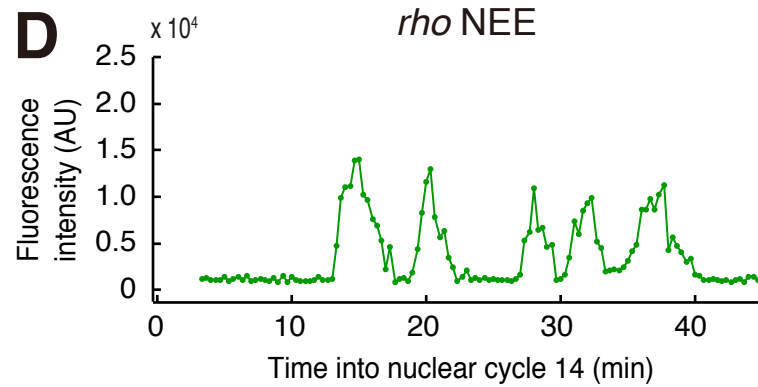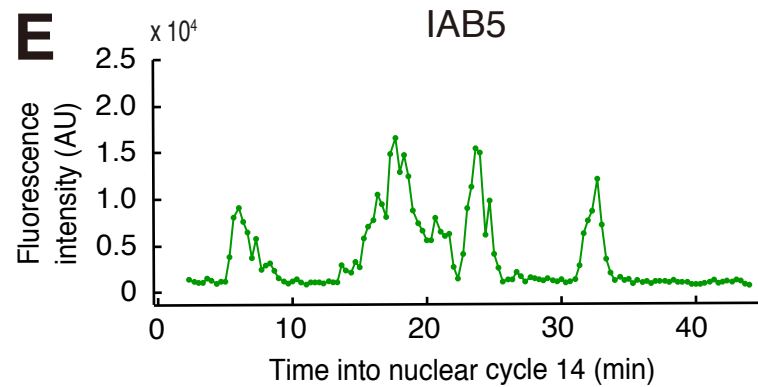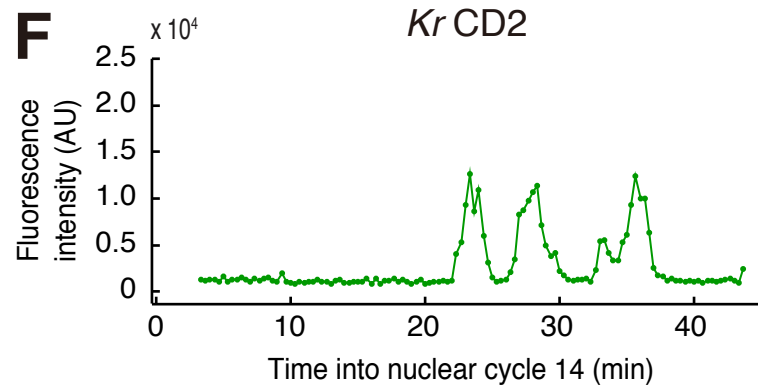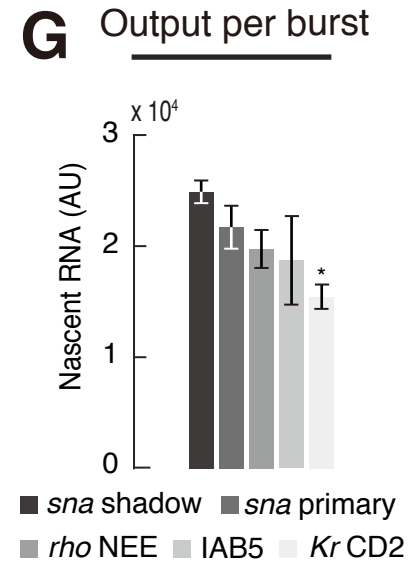

Supplement: NIHMS795316-supplement-2.pdf [file NIHMS795316-supplement-2.pdf]

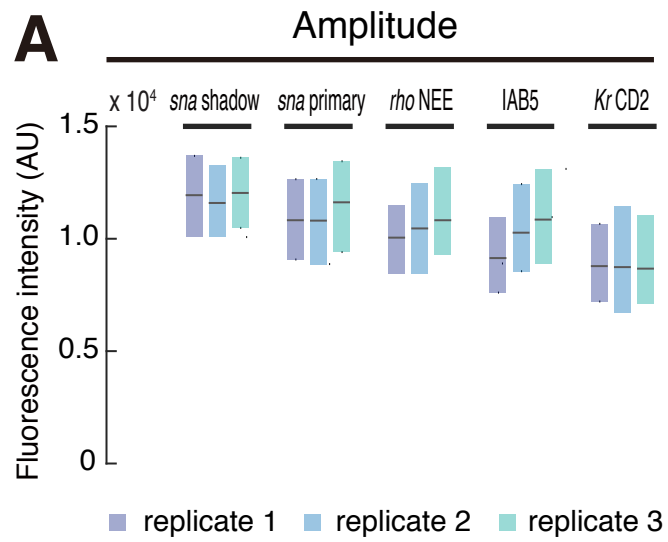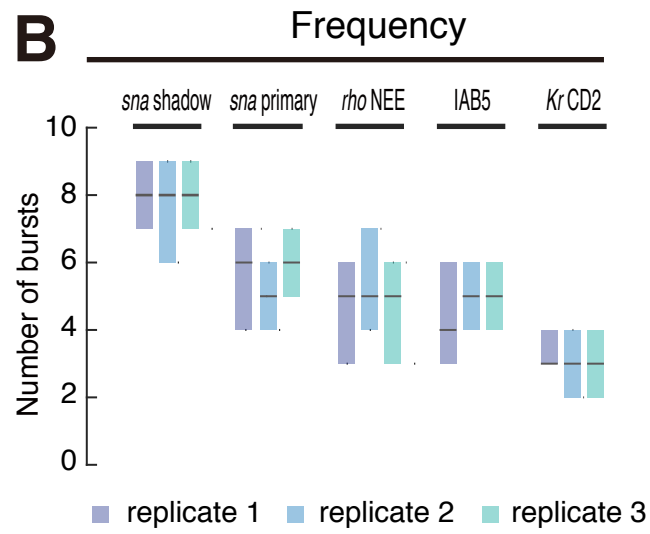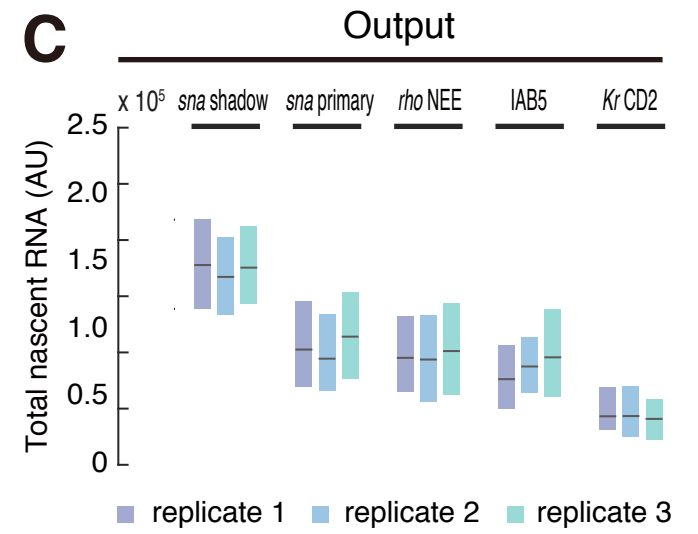

Supplement: NIHMS795316-supplement-3.pdf [file NIHMS795316-supplement-3.pdf]

**A**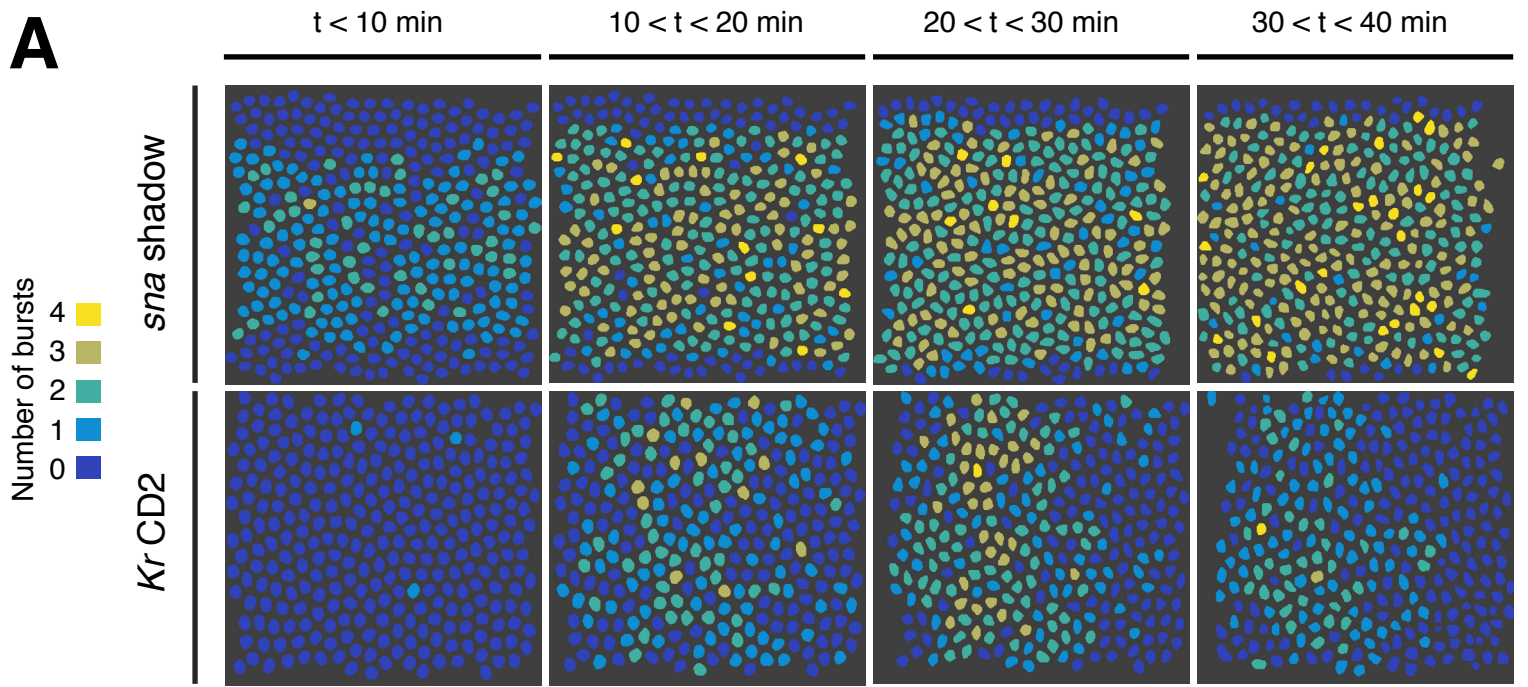**B**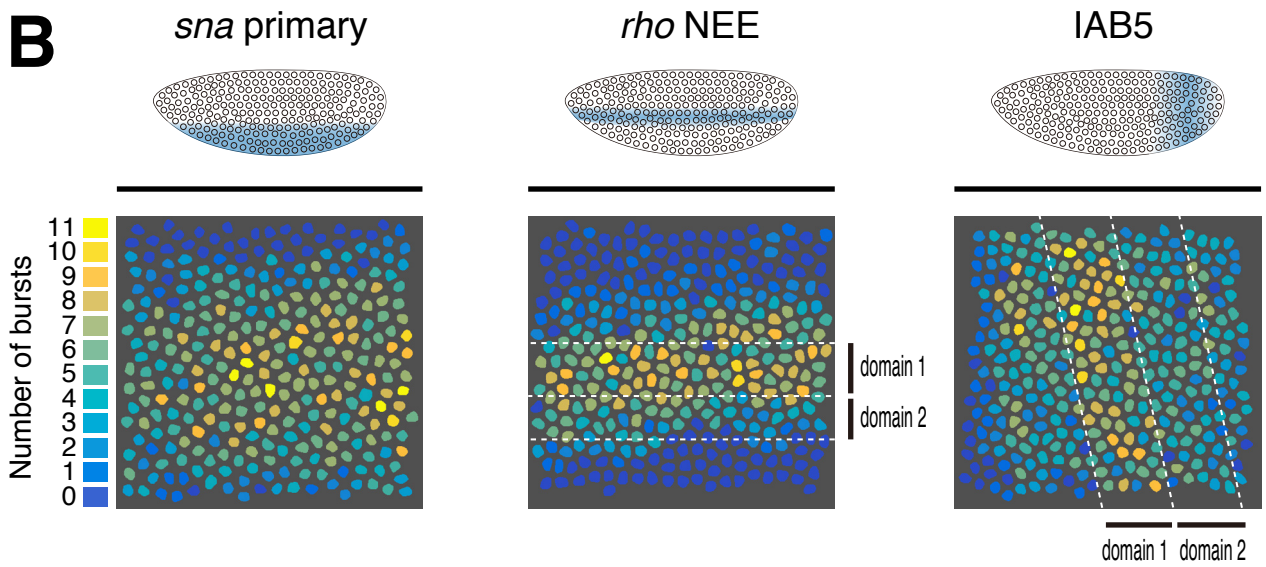**C**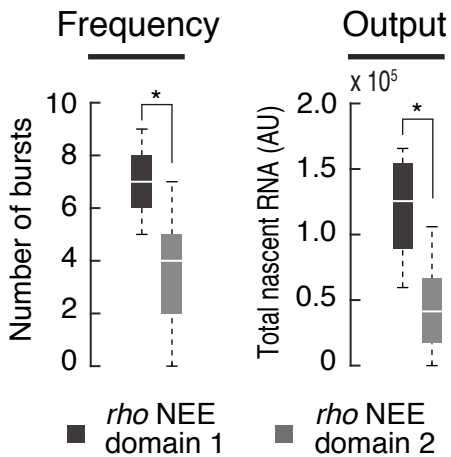**D**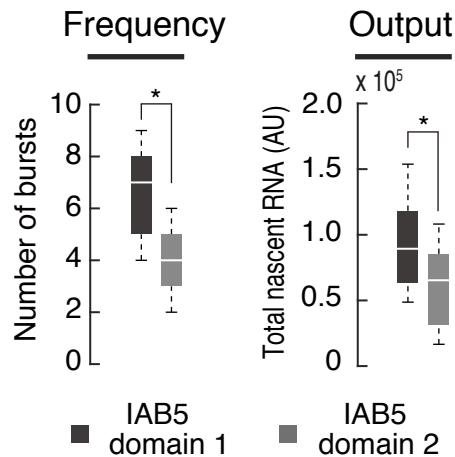

Supplement: NIHMS795316-supplement-4.pdf [file NIHMS795316-supplement-4.pdf]

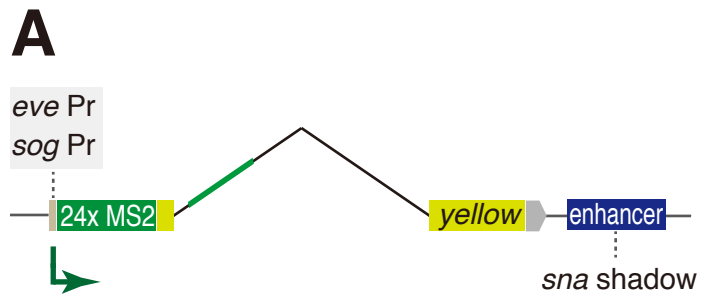

**B**

- *sna* Pr
- *eve* Pr
- *sog* Pr

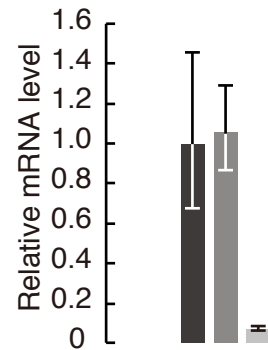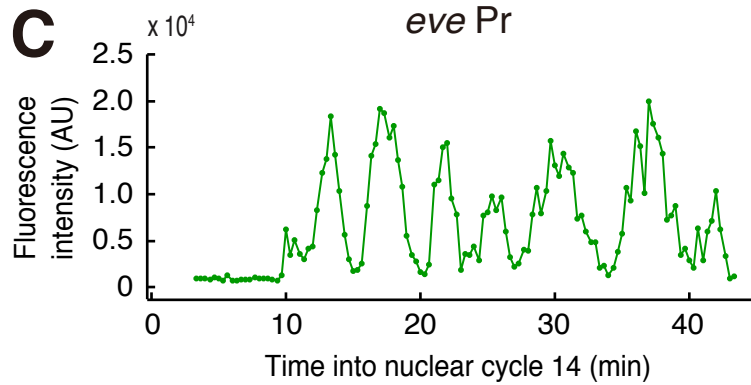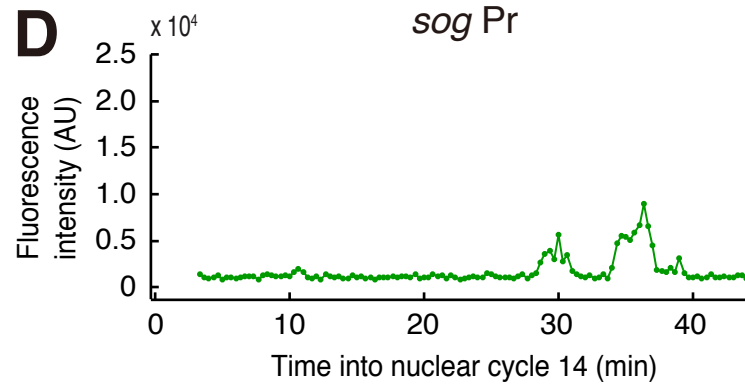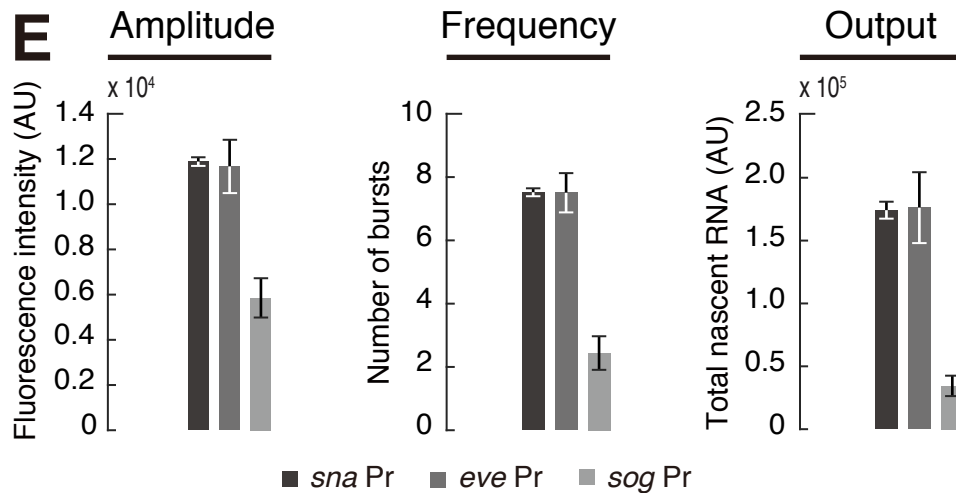

Supplement: NIHMS795316-supplement-5.pdf [file NIHMS795316-supplement-5.pdf]

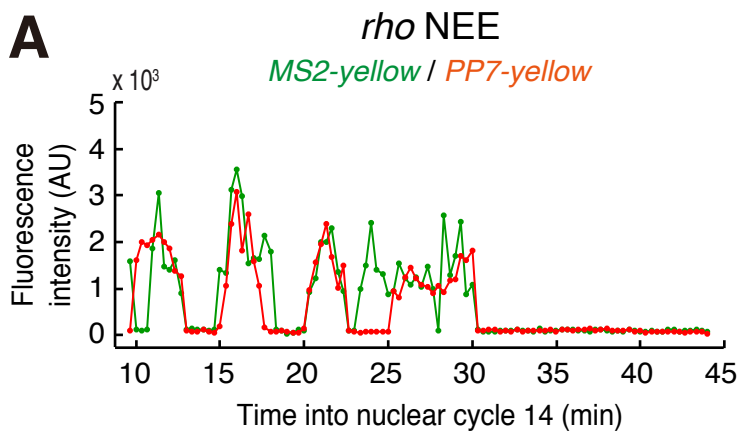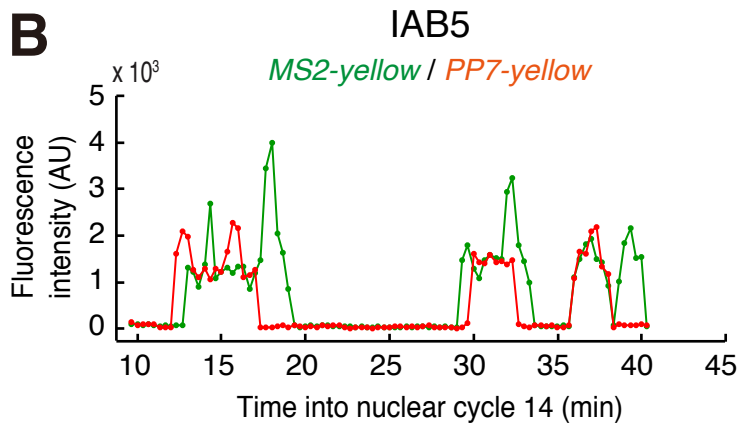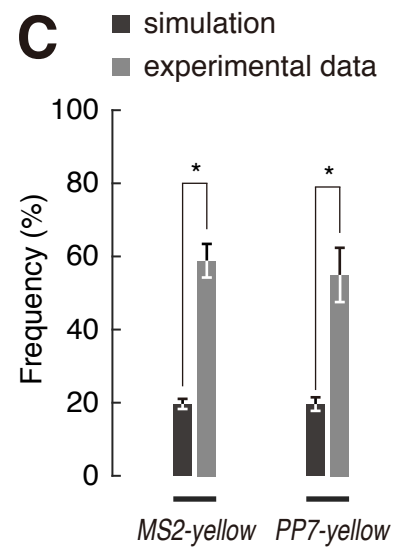

Supplement: NIHMS795316-supplement-6.pdf [file NIHMS795316-supplement-6.pdf]

**A**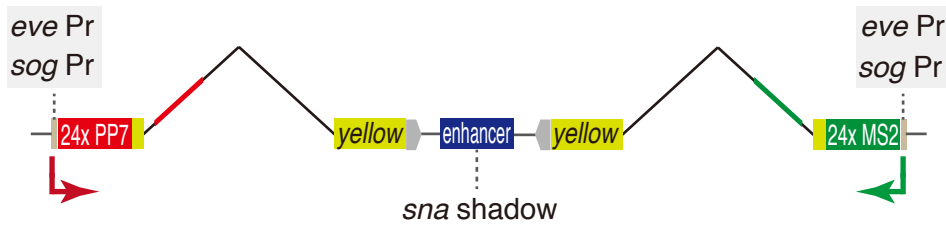**B**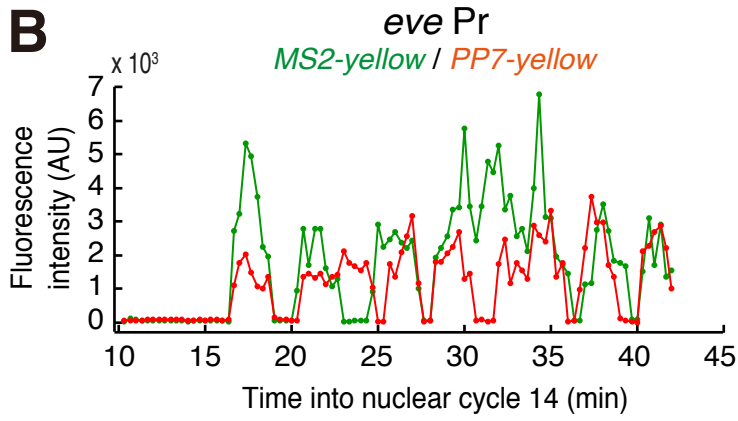**C**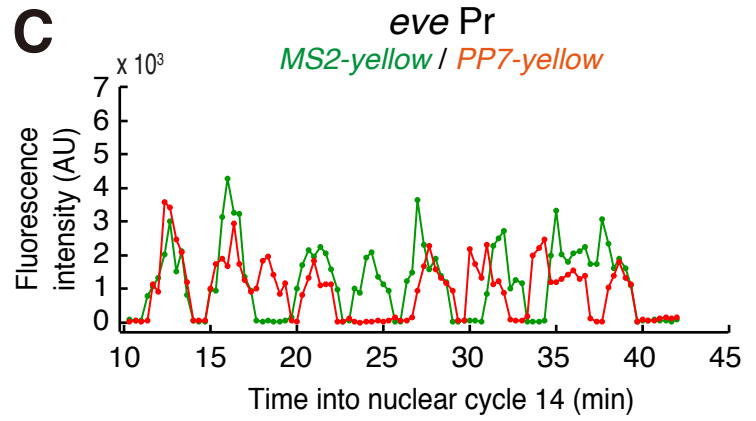**D**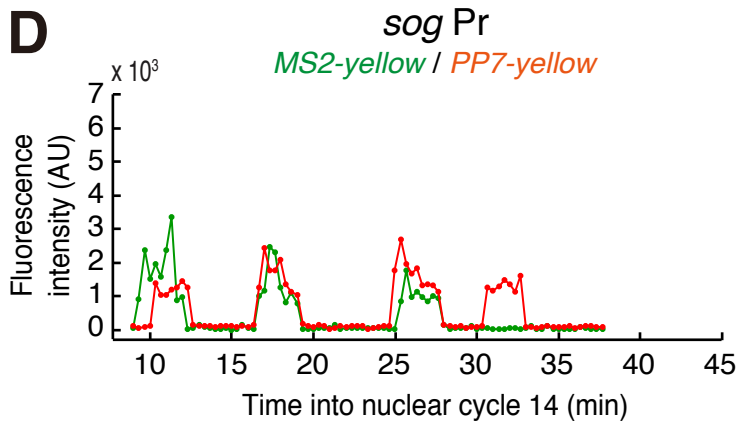**E**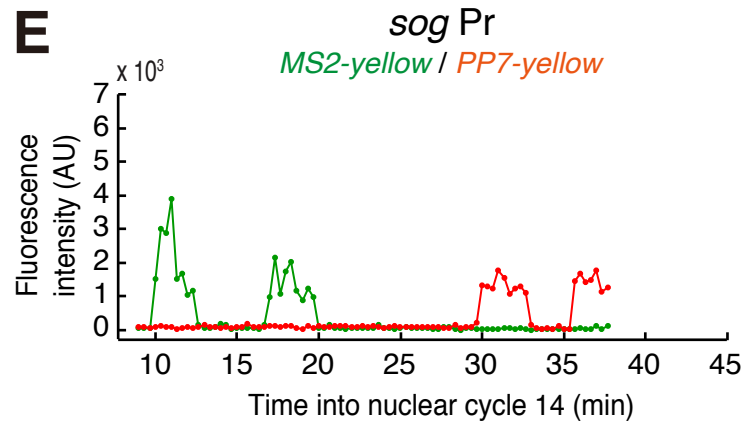**F**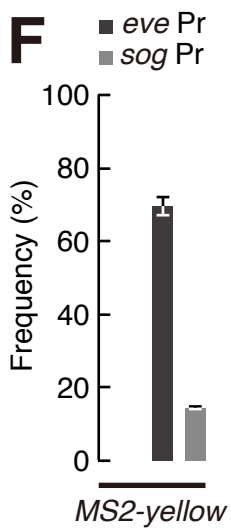**G**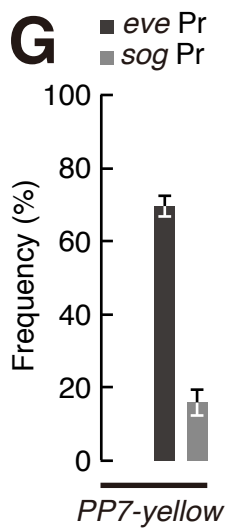

Supplement: NIHMS795316-supplement-7.pdf [file NIHMS795316-supplement-7.pdf]
